# Supplementary material for: Drug Repurposing to Treat Glucocorticoid Resistance in Asthma
Source: PubMed Central journal article supplement (PMC7999884; doi:10.3390/jpm11030175), 2021-03-03
Supplement: jpm-11-00175-s001.pdf [file jpm-11-00175-s001.pdf]

## Drug repurposing to treat glucocorticoid resistance in asthma

Alberta L. Wang MD, MS, Ronald Panganiban PhD, Weiliang Qiu PhD, Alvin T. Kho PhD, Geoffrey Chupp MD, Deborah A. Meyers PhD, Eugene R. Blecker MD, Scott T. Weiss MD, MS, Quan Lu PhD, Kelan G. Tantisira MD, MPH

**Figure S1.** Change in FEV<sub>1</sub> percent predicted in CAMP and SARP

- a) Change in FEV<sub>1</sub> % predicted in CAMP from enrollment to month two on inhaled budesonide. Subjects in the first tertile were poor responders and in the third tertile were good responders. Median change in FEV<sub>1</sub> % predicted in the lowest tertile was -2.7 ( $\pm$  6.7), middle tertile was 4.9 ( $\pm$  3.3), and highest tertile was 15.8 ( $\pm$  16.7) ( $P < 0.001$ ).

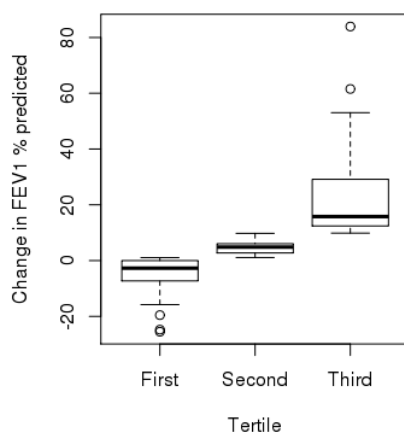

- b) Change in FEV<sub>1</sub> % predicted in SARP from visit 2 prior to administration of intramuscular triamcinolone to visit 3 eighteen days post-corticosteroid administration. Median change in FEV<sub>1</sub> % predicted of -4.0 ( $\pm$  5.6) in poor responders and 2.6 ( $\pm$  3.9) in good responders ( $P < 0.001$ ).

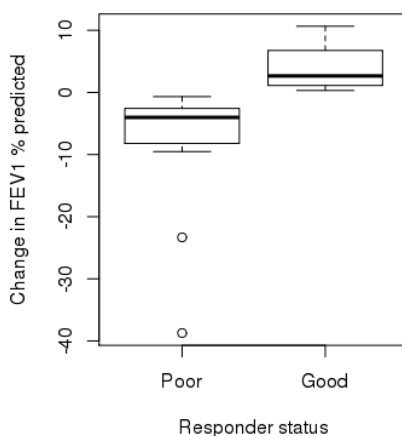

**Table S1.** Genes in CAMP differentially expressed in corticosteroid poor responders compared to corticosteroid good responders

| Entrez gene ID | HGNC gene symbol | Chromosome band | T-statistic | P-value  |
|----------------|------------------|-----------------|-------------|----------|
| 23090          | <i>ZNF423</i>    | 16q12.1         | -4.18       | 6.17E-05 |
| 3763           | <i>KCNJ6</i>     | 21q22.13        | -4.16       | 6.81E-05 |
| 168002         | <i>DACT2</i>     | 6q27            | -3.86       | 1.99E-04 |
| 8704           | <i>B4GALT2</i>   | 1p34.1          | -3.76       | 2.91E-04 |
| 84570          | <i>COL25A1</i>   | 4q25            | -3.71       | 3.42E-04 |
| 51166          | <i>AADAT</i>     | 4q33            | 3.66        | 4.12E-04 |
| 6785           | <i>ELOVL4</i>    | 6q14.1          | -3.63       | 4.57E-04 |
| 402317         | <i>OR2A42</i>    | 7q35            | -3.62       | 4.59E-04 |
| 9796           | <i>PHYHIP</i>    | 8p21.3          | 3.57        | 5.50E-04 |
| 10107          | <i>TRIM10</i>    | 6p22.1          | -3.50       | 6.98E-04 |
| 54581          | <i>SCAND2P</i>   | 15q25.2         | -3.47       | 7.71E-04 |
| 200312         | <i>RNF215</i>    | 22q12.2         | 3.47        | 7.74E-04 |
| 148170         | <i>CDC42EP5</i>  | 19q13.42        | -3.41       | 9.53E-04 |
| 92747          | <i>BPIFB1</i>    | 20q11.21        | -3.36       | 1.09E-03 |
| 153579         | <i>BTNL9</i>     | 5q35.3          | 3.36        | 1.10E-03 |
| 172            | <i>AFG3L1P</i>   | 16q24.3         | 3.33        | 1.23E-03 |
| 337963         | <i>KRTAP23-1</i> | 21q22.11        | -3.33       | 1.23E-03 |
| 399879         | NA               | NA              | -3.32       | 1.28E-03 |
| 391114         | <i>OR6K3</i>     | 1q23.1          | -3.31       | 1.31E-03 |
| 389337         | <i>ARHGEF37</i>  | 5q32            | 3.27        | 1.46E-03 |
| 85317          | <i>BAGE4</i>     | 21p11.1         | -3.25       | 1.58E-03 |
| 9611           | <i>NCOR1</i>     | 17p12-p11.2     | -3.23       | 1.66E-03 |
| 84166          | <i>NLRC5</i>     | 16q13           | 3.18        | 1.96E-03 |
| 284129         | <i>SLC26A11</i>  | 17q25.3         | 3.18        | 1.99E-03 |
| 6728           | <i>SRP19</i>     | 5q22.2          | -3.17       | 2.04E-03 |
| 6121           | <i>RPE65</i>     | 1p31.3          | -3.16       | 2.07E-03 |
| 10347          | <i>ABCA7</i>     | 19p13.3         | 3.16        | 2.10E-03 |
| 25907          | <i>TMEM158</i>   | 3p21.31         | -3.14       | 2.24E-03 |
| 178            | <i>AGL</i>       | 1p21.2          | -3.13       | 2.29E-03 |
| 10123          | <i>ARL4C</i>     | 2q37.1          | 3.13        | 2.30E-03 |
| 341276         | <i>OR10A2</i>    | 11p15.4         | -3.12       | 2.34E-03 |
| 84645          | <i>C22orf23</i>  | 22q13.1         | -3.10       | 2.51E-03 |
| 5599           | <i>MAPK8</i>     | 10q11.22        | 3.10        | 2.55E-03 |
| 8601           | <i>RGS20</i>     | 8q11.23         | 3.08        | 2.67E-03 |
| 57795          | <i>BRINP2</i>    | 1q25.2          | -3.07       | 2.72E-03 |
| 149469         | NA               | NA              | -3.06       | 2.86E-03 |
| 27239          | <i>GPR162</i>    | 12p13.31        | -3.05       | 2.92E-03 |
| 28981          | <i>IFT81</i>     | 12q24.11        | -3.05       | 2.95E-03 |

|        |                  |          |       |          |
|--------|------------------|----------|-------|----------|
| 554226 | <i>ANKRD30BL</i> | 2q21.2   | 3.05  | 2.96E-03 |
| 504188 | NA               | NA       | -3.05 | 2.96E-03 |
| 117144 | <i>CATSPER1</i>  | 11q13.1  | -3.04 | 3.00E-03 |
| 899    | <i>CCNF</i>      | 16p13.3  | -3.04 | 3.04E-03 |
| 5333   | <i>PLCD1</i>     | 3p22.2   | 3.03  | 3.08E-03 |
| 56034  | <i>PDGFC</i>     | 4q32.1   | 3.03  | 3.16E-03 |
| 6442   | <i>SGCA</i>      | 17q21.33 | -3.02 | 3.25E-03 |
| 10520  | <i>ZNF211</i>    | 19q13.43 | 3.02  | 3.26E-03 |
| 56888  | <i>KCMF1</i>     | 2p11.2   | -3.00 | 3.39E-03 |
| 6772   | <i>STAT1</i>     | 2q32.2   | -2.98 | 3.58E-03 |
| 54819  | <i>ZCCHC10</i>   | 5q31.1   | -2.97 | 3.69E-03 |
| 30812  | <i>SOX8</i>      | 16p13.3  | -2.97 | 3.71E-03 |
| 11162  | <i>NUDT6</i>     | 4q28.1   | -2.96 | 3.82E-03 |
| 8793   | <i>TNFRSF10D</i> | 8p21.3   | 2.96  | 3.84E-03 |
| 256933 | <i>NPB</i>       | 17q25.3  | 2.96  | 3.84E-03 |
| 9424   | <i>KCNK6</i>     | 19q13.2  | 2.96  | 3.88E-03 |
| 9128   | <i>PRPF4</i>     | 9q32     | -2.95 | 3.99E-03 |
| 2115   | <i>ETV1</i>      | 7p21.2   | 2.94  | 4.09E-03 |
| 51700  | <i>CYB5R2</i>    | 11p15.4  | -2.93 | 4.25E-03 |
| 9628   | <i>RGS6</i>      | 14q24.2  | -2.92 | 4.34E-03 |
| 84929  | <i>FIBCD1</i>    | 9q34.12  | 2.91  | 4.50E-03 |
| 51816  | <i>ADA2</i>      | 22q11.1  | 2.91  | 4.50E-03 |
| 160518 | <i>DENND5B</i>   | 12p11.21 | -2.91 | 4.50E-03 |
| 252995 | <i>FNDC5</i>     | 1p35.1   | -2.90 | 4.54E-03 |
| 4361   | <i>MRE11</i>     | 11q21    | 2.89  | 4.71E-03 |
| 2230   | <i>FDX1</i>      | 11q22.3  | -2.88 | 4.80E-03 |
| 283685 | <i>GOLGA6L2</i>  | 15q11.2  | -2.88 | 4.81E-03 |
| 55867  | <i>SLC22A11</i>  | 11q13.1  | 2.87  | 5.08E-03 |
| 337976 | <i>KRTAP20-2</i> | 21q22.11 | 2.86  | 5.12E-03 |
| 166336 | <i>PRICKLE2</i>  | 3p14.1   | 2.86  | 5.14E-03 |
| 9609   | <i>RAB36</i>     | 22q11.23 | 2.86  | 5.17E-03 |
| 23414  | <i>ZFPM2</i>     | 8q23.1   | 2.86  | 5.20E-03 |
| 387758 | <i>FIBIN</i>     | 11p14.2  | 2.85  | 5.26E-03 |
| 4916   | <i>NTRK3</i>     | 15q25.3  | 2.84  | 5.41E-03 |
| 79642  | <i>ARSJ</i>      | 4q26     | -2.84 | 5.41E-03 |
| 7399   | <i>USH2A</i>     | 1q41     | 2.84  | 5.50E-03 |
| 84171  | <i>LOXL4</i>     | 10q24.2  | 2.83  | 5.57E-03 |
| 127254 | <i>ERICH3</i>    | 1p31.1   | -2.83 | 5.57E-03 |
| 2054   | <i>STX2</i>      | 12q24.33 | 2.83  | 5.58E-03 |
| 80279  | <i>CDK5RAP3</i>  | 17q21.32 | 2.82  | 5.80E-03 |
| 4192   | <i>MDK</i>       | 11p11.2  | 2.82  | 5.86E-03 |
| 8706   | <i>B3GALNT1</i>  | 3q26.1   | 2.80  | 6.16E-03 |

|        |                    |          |       |          |
|--------|--------------------|----------|-------|----------|
| 147409 | <i>DSG4</i>        | 18q12.1  | 2.80  | 6.18E-03 |
| 255352 | NA                 | NA       | 2.80  | 6.19E-03 |
| 3305   | <i>HSPA1L</i>      | 6p21.33  | -2.79 | 6.26E-03 |
| 90187  | <i>EMILIN3</i>     | 20q12    | 2.79  | 6.37E-03 |
| 8484   | <i>GALR3</i>       | 22q13.1  | -2.78 | 6.43E-03 |
| 81833  | <i>SPACA1</i>      | 6q15     | 2.78  | 6.56E-03 |
| 56606  | <i>SLC2A9</i>      | 4p16.1   | 2.77  | 6.67E-03 |
| 9689   | <i>BZW1</i>        | 2q33.1   | -2.77 | 6.77E-03 |
| 441639 | <i>OR9K2</i>       | 12q13.2  | -2.77 | 6.78E-03 |
| 66037  | <i>BOLL</i>        | 2q33.1   | 2.76  | 6.79E-03 |
| 221718 | <i>LINC00518</i>   | 6p24.3   | -2.76 | 6.95E-03 |
| 8218   | <i>CLTCL1</i>      | 22q11.21 | -2.74 | 7.24E-03 |
| 1761   | <i>DMRT1</i>       | 9p24.3   | 2.74  | 7.25E-03 |
| 400110 | <i>ANKRD20A19P</i> | 13q12.12 | -2.74 | 7.32E-03 |
| 55281  | <i>TMEM140</i>     | 7q33     | -2.73 | 7.40E-03 |
| 25948  | <i>KBTBD2</i>      | 7p14.3   | 2.73  | 7.51E-03 |
| 54567  | <i>DLL4</i>        | 15q15.1  | 2.73  | 7.51E-03 |
| 4009   | <i>LMX1A</i>       | 1q23.3   | 2.72  | 7.63E-03 |
| 339175 | <i>METTL2A</i>     | 17q23.2  | -2.72 | 7.66E-03 |
| 2917   | <i>GRM7</i>        | 3p26.1   | -2.72 | 7.76E-03 |
| 400823 | <i>FAM177B</i>     | 1q41     | -2.72 | 7.80E-03 |
| 27237  | <i>ARHGEF16</i>    | 1p36.32  | 2.71  | 7.87E-03 |
| 26952  | <i>SMR3A</i>       | 4q13.3   | -2.71 | 7.89E-03 |
| 8503   | <i>PIK3R3</i>      | 1p34.1   | 2.71  | 8.01E-03 |
| 3855   | <i>KRT7</i>        | 12q13.13 | 2.70  | 8.19E-03 |
| 84106  | <i>PRAM1</i>       | 19p13.2  | -2.70 | 8.20E-03 |
| 10413  | <i>YAP1</i>        | 11q22.1  | -2.70 | 8.26E-03 |
| 54887  | <i>UHRF1BP1</i>    | 6p21.31  | 2.69  | 8.33E-03 |
| 440590 | <i>ZYG11A</i>      | 1p32.3   | 2.69  | 8.34E-03 |
| 127064 | <i>OR2T12</i>      | 1q44     | -2.69 | 8.43E-03 |
| 554251 | <i>FBXO48</i>      | 2p13.3   | 2.69  | 8.45E-03 |
| 27129  | <i>HSPB7</i>       | 1p36.13  | -2.69 | 8.48E-03 |
| 283358 | <i>B4GALNT3</i>    | 12p13.33 | 2.69  | 8.48E-03 |
| 8785   | <i>MATN4</i>       | 20q13.12 | -2.68 | 8.60E-03 |
| 84251  | <i>SGIP1</i>       | 1p31.3   | 2.68  | 8.60E-03 |
| 84220  | <i>RGPD5</i>       | 2q13     | -2.68 | 8.62E-03 |
| 284296 | NA                 | NA       | 2.68  | 8.65E-03 |
| 53335  | <i>BCL11A</i>      | 2p16.1   | -2.68 | 8.67E-03 |
| 3886   | <i>KRT35</i>       | 17q21.2  | -2.68 | 8.71E-03 |
| 337880 | <i>KRTAP11-1</i>   | 21q22.11 | -2.68 | 8.73E-03 |
| 917    | <i>CD3G</i>        | 11q23.3  | -2.67 | 8.89E-03 |
| 947    | <i>CD34</i>        | 1q32.2   | -2.67 | 8.91E-03 |

---

|        |                |          |       |          |
|--------|----------------|----------|-------|----------|
| 3671   | <i>ISLR</i>    | 15q24.1  | -2.66 | 9.05E-03 |
| 163259 | <i>DENND2C</i> | 1p13.2   | 2.66  | 9.10E-03 |
| 149233 | <i>IL23R</i>   | 1p31.3   | 2.66  | 9.13E-03 |
| 22981  | <i>NINL</i>    | 20p11.21 | -2.66 | 9.23E-03 |
| 4620   | <i>MYH2</i>    | 17p13.1  | 2.65  | 9.40E-03 |
| 10575  | <i>CCT4</i>    | 2p15     | -2.64 | 9.56E-03 |
| 6183   | <i>MRPS12</i>  | 19q13.2  | -2.64 | 9.57E-03 |
| 196527 | <i>ANO6</i>    | 12q12    | -2.64 | 9.63E-03 |
| 388646 | <i>GBP7</i>    | 1p22.2   | 2.63  | 9.91E-03 |
| 777    | <i>CACNA1E</i> | 1q25.3   | 2.63  | 9.94E-03 |
| 4197   | NA             | NA       | 2.63  | 9.94E-03 |
| 5803   | <i>PTPRZ1</i>  | 7q31.32  | 2.63  | 9.97E-03 |

**Table S2.** Genes in SARP differentially expressed in corticosteroid poor responders compared to corticosteroid good responders

| Ensembl stable ID | Entrez gene ID | HGNC gene symbol | Chromosome band | T-statistic | P-value  |
|-------------------|----------------|------------------|-----------------|-------------|----------|
| ENSG00000188242   | 170622         | COMMD6           | 13q22.2         | -4.75       | 2.19E-04 |
| ENSG00000224936   | 100302691      | LINC00184        | 1q42.3          | -4.68       | 2.52E-04 |
| ENSG00000172425   | 221421         | RSPH9            | 6p21.1          | -4.67       | 2.59E-04 |
| ENSG00000196465   | 90576          | ZNF799           | 19p13.2         | -4.65       | 2.70E-04 |
| ENSG00000260053   | 352963         | HLA-P            | 6p22.1          | -4.61       | 2.92E-04 |
| ENSG00000162910   | 574407         | OBSCN-AS1        | 1q42.13         | -4.36       | 4.87E-04 |
| ENSG00000158560   | 5207           | PFKFB1           | Xp11.21         | -4.32       | 5.31E-04 |
| ENSG00000213971   | ---            | NA               | NA              | -4.24       | 6.25E-04 |
| ENSG00000272888   | ---            | NA               | NA              | 4.21        | 6.65E-04 |
| ENSG00000236035   | 100507114      | LINC00445        | 13q13.3         | -4.17       | 7.30E-04 |
| ENSG00000239128   | ---            | NA               | NA              | 4.16        | 7.36E-04 |
| ENSG00000248126   | ---            | NA               | NA              | -4.15       | 7.52E-04 |
| ENSG00000174951   | 170506         | DHX36            | 3q25.2          | -4.09       | 8.65E-04 |
| ENSG00000213046   | 163486         | DENND1B          | 1q31.3          | 4.07        | 8.88E-04 |
| ENSG00000262516   | ---            | NA               | NA              | -4.07       | 8.89E-04 |
| ENSG00000163202   | 4184           | SMCP             | 1q21.3          | -4.02       | 9.90E-04 |
| ENSG00000231169   | ---            | NA               | NA              | -3.99       | 1.07E-03 |
| ENSG00000273192   | 246785         | OLA1P1           | 22q13.2         | -3.97       | 1.11E-03 |
| ENSG00000261519   | 284215         | DLGAP1-AS5       | 18p11.31        | -3.94       | 1.17E-03 |
| ENSG00000167618   | 284339         | TMEM145          | 19q13.2         | -3.91       | 1.24E-03 |
| ENSG00000187952   | 441194         | PMS2CL           | 7p22.1          | 3.88        | 1.33E-03 |
| ENSG00000131686   | 261734         | NPHP4            | 1p36.31         | -3.83       | 1.49E-03 |
| ENSG00000152082   | 112714         | TUBA3E           | 2q21.1          | -3.79       | 1.60E-03 |
| ENSG00000167311   | 10449          | ACAA2            | 18q21.1         | 3.79        | 1.60E-03 |
| ENSG00000088320   | 22974          | TPX2             | 20q11.21        | 3.75        | 1.75E-03 |
| ENSG00000271525   | ---            | NA               | NA              | 3.75        | 1.75E-03 |
| ENSG00000207926   | 407028         | MIR302A          | 4q25            | -3.73       | 1.82E-03 |
| ENSG00000105205   | 79935          | CCNP             | 19q13.2         | 3.72        | 1.88E-03 |
| ENSG00000212158   | ---            | NA               | NA              | -3.70       | 1.96E-03 |
| ENSG00000169918   | 2990           | GUSB             | 7q11.21         | 3.70        | 1.97E-03 |
| ENSG00000259208   | ---            | NA               | NA              | -3.69       | 2.00E-03 |
| ENSG00000073536   | 6389           | SDHA             | 5p15.33         | -3.66       | 2.12E-03 |
| ENSG00000237211   | ---            | NA               | NA              | 3.64        | 2.22E-03 |
| ENSG00000120279   | 80231          | TASL             | Xp21.2          | 3.62        | 2.29E-03 |
| ENSG00000262096   | ---            | NA               | NA              | -3.60       | 2.40E-03 |
| ENSG00000164077   | 4486           | MST1R            | 3p21.31         | -3.60       | 2.42E-03 |
| ENSG00000257838   | ---            | NA               | NA              | -3.59       | 2.45E-03 |
| ENSG00000140465   | 170691         | ADAMTS17         | 15q26.3         | -3.54       | 2.72E-03 |

|                 |           |                  |                 |       |          |
|-----------------|-----------|------------------|-----------------|-------|----------|
| ENSG00000183454 | ---       | NA               | NA              | -3.51 | 2.89E-03 |
| ENSG00000198838 | 11179     | <i>ZNF277</i>    | 7q31.1          | -3.51 | 2.89E-03 |
| ENSG00000166741 | 116285    | <i>ACSM1</i>     | 16p12.3         | -3.49 | 3.04E-03 |
| ENSG00000257246 | ---       | NA               | NA              | -3.48 | 3.12E-03 |
| ENSG00000250045 | ---       | NA               | NA              | -3.47 | 3.17E-03 |
| ENSG00000139610 | 6601      | <i>SMARCC2</i>   | 12q13.2         | -3.44 | 3.35E-03 |
| ENSG00000164051 | 84126     | <i>ATRIP</i>     | 3p21.31         | -3.43 | 3.44E-03 |
| ENSG00000229020 | ---       | NA               | NA              | -3.43 | 3.44E-03 |
| ENSG00000175782 | 145270    | <i>PRIMA1</i>    | 14q32.12        | -3.43 | 3.48E-03 |
| ENSG00000230956 | 646366    | <i>MAS1LP1</i>   | 6p22.1          | 3.42  | 3.51E-03 |
| ENSG00000253146 | ---       | NA               | NA              | -3.42 | 3.51E-03 |
| ENSG00000250425 | 100130017 | <i>FTLP10</i>    | 4q13.2          | -3.42 | 3.53E-03 |
| ENSG00000258452 | 79334     | <i>OR11H2</i>    | 14q11.2         | -3.41 | 3.61E-03 |
| ENSG00000158220 | 55179     | <i>FAIM</i>      | 3q22.3          | -3.40 | 3.70E-03 |
| ENSG00000161243 | 93099     | <i>DMKN</i>      | 19q13.12        | -3.39 | 3.73E-03 |
| ENSG00000207650 | 407020    | <i>MIR28</i>     | 3q28            | 3.35  | 4.10E-03 |
| ENSG00000165192 | 57526     | <i>PCDH19</i>    | Xq22.1          | -3.34 | 4.15E-03 |
| ENSG00000136444 | 4836      | <i>NMT1</i>      | 17q21.31        | -3.34 | 4.16E-03 |
| ENSG00000242683 | 3108      | <i>HLA-DMA</i>   | 6p21.32         | 3.34  | 4.17E-03 |
| ENSG00000218748 | ---       | NA               | NA              | -3.33 | 4.24E-03 |
| ENSG00000229754 | ---       | NA               | NA              | 3.32  | 4.36E-03 |
| ENSG00000267317 | ---       | NA               | NA              | -3.31 | 4.41E-03 |
| ENSG00000160224 | 755       | <i>CFAP410</i>   | 21q22.3         | 3.31  | 4.42E-03 |
| ENSG00000158477 | 9825      | <i>SPATA2</i>    | 20q13.13        | 3.31  | 4.42E-03 |
| ENSG00000123989 | 23549     | <i>DNPEP</i>     | 2q35            | 3.31  | 4.45E-03 |
| ENSG00000249489 | ---       | NA               | NA              | 3.31  | 4.47E-03 |
| ENSG00000276103 | ---       | NA               | NA              | -3.31 | 4.47E-03 |
| ENSG00000235817 | 441931    | <i>VN1R17P</i>   | 1q44            | -3.31 | 4.48E-03 |
| ENSG00000204529 | 5460      | <i>POU5F1</i>    | 6p21.33         | -3.31 | 4.49E-03 |
| ENSG00000235437 | 144832    | <i>ESRRAP2</i>   | 13q12.11        | 3.30  | 4.51E-03 |
| ENSG00000203782 | 574414    | <i>PRR9</i>      | 1q21.3          | 3.30  | 4.55E-03 |
| ENSG00000183248 | 4764      | <i>NF1P3</i>     | 21q11.2         | 3.30  | 4.57E-03 |
| ENSG00000087494 | 116154    | <i>PHACTR3</i>   | 20q13.32-q13.33 | 3.29  | 4.59E-03 |
| ENSG00000242282 | 100133100 | <i>RPL6P8</i>    | 3q25.33         | -3.29 | 4.61E-03 |
| ENSG00000215199 | 389207    | <i>GRXCR1</i>    | 4p13            | 3.29  | 4.66E-03 |
| ENSG00000258212 | ---       | NA               | NA              | -3.29 | 4.67E-03 |
| ENSG00000242314 | 106479473 | <i>RN7SL685P</i> | 8q22.3          | -3.28 | 4.77E-03 |
| ENSG00000225828 | 2074      | <i>ERCC6</i>     | 10q11.23        | -3.27 | 4.80E-03 |
| ENSG00000141753 | 60681     | <i>FKBP10</i>    | 17q21.2         | 3.27  | 4.81E-03 |
| ENSG00000225338 | ---       | NA               | NA              | -3.27 | 4.81E-03 |
| ENSG00000188747 | 440452    | <i>TBC1D3P2</i>  | 17q23.2         | -3.27 | 4.84E-03 |
| ENSG00000272501 | ---       | NA               | NA              | -3.25 | 5.01E-03 |

|                 |           |                  |            |       |          |
|-----------------|-----------|------------------|------------|-------|----------|
| ENSG00000249852 | 222537    | <i>HS3ST5</i>    | 6q21-q22.1 | -3.25 | 5.08E-03 |
| ENSG00000187024 | 337978    | <i>KRTAP21-2</i> | 21q22.11   | 3.24  | 5.12E-03 |
| ENSG00000164400 | 23176     | <i>SEPTIN8</i>   | 5q31.1     | 3.23  | 5.25E-03 |
| ENSG00000243970 | 391559    | <i>VTI1BP1</i>   | 3q12.1     | -3.23 | 5.28E-03 |
| ENSG00000211666 | 28802     | <i>IGLV3-12</i>  | 22q11.22   | 3.22  | 5.34E-03 |
| ENSG00000248578 | ---       | NA               | NA         | -3.22 | 5.37E-03 |
| ENSG00000244094 | 100128140 | <i>RPS4XP17</i>  | 17p13.3    | -3.21 | 5.44E-03 |
| ENSG00000264017 | ---       | NA               | NA         | -3.21 | 5.45E-03 |
| ENSG00000218416 | ---       | NA               | NA         | 3.21  | 5.48E-03 |
| ENSG00000228347 | 106479047 | <i>EFCAB14P1</i> | 1p34.3     | -3.20 | 5.60E-03 |
| ENSG00000271100 | ---       | NA               | NA         | 3.20  | 5.61E-03 |
| ENSG00000117281 | 1889      | <i>ECE1</i>      | 1p36.12    | -3.20 | 5.63E-03 |
| ENSG00000211592 | 28946     | <i>IGKJ5</i>     | 2p11.2     | 3.19  | 5.67E-03 |
| ENSG00000134443 | 57614     | <i>RELCH</i>     | 18q21.33   | 3.19  | 5.72E-03 |
| ENSG00000188825 | 84464     | <i>SLX4</i>      | 16p13.3    | 3.18  | 5.80E-03 |
| ENSG00000197121 | 6714      | <i>SRC</i>       | 20q11.23   | 3.18  | 5.86E-03 |
| ENSG00000145794 | 171019    | <i>ADAMTS19</i>  | 5q23.3     | 3.17  | 5.90E-03 |
| ENSG00000243466 | 27160     | <i>INGX</i>      | Xq13.1     | 3.16  | 6.04E-03 |
| ENSG00000225470 | ---       | NA               | NA         | 3.16  | 6.11E-03 |
| ENSG00000231378 | 100132467 | <i>RNF2P1</i>    | 9p24.1     | 3.15  | 6.21E-03 |
| ENSG00000212579 | 654321    | <i>SNORA75</i>   | 2q37.1     | -3.15 | 6.24E-03 |
| ENSG00000265790 | ---       | NA               | NA         | 3.14  | 6.34E-03 |
| ENSG00000278829 | ---       | NA               | NA         | -3.14 | 6.37E-03 |
| ENSG00000186453 | 400830    | <i>DEFB132</i>   | 20p13      | 3.13  | 6.45E-03 |
| ENSG00000233028 | ---       | NA               | NA         | -3.13 | 6.45E-03 |
| ENSG00000230841 | ---       | NA               | NA         | -3.13 | 6.47E-03 |
| ENSG00000211694 | 6983      | <i>TRGV9</i>     | 7p14.1     | 3.13  | 6.48E-03 |
| ENSG00000220161 | ---       | NA               | NA         | -3.13 | 6.53E-03 |
| ENSG00000225264 | 100506161 | <i>TAF1A-AS1</i> | 1q41       | -3.13 | 6.53E-03 |
| ENSG00000236723 | ---       | NA               | NA         | -3.12 | 6.59E-03 |
| ENSG00000228775 | ---       | NA               | NA         | -3.12 | 6.63E-03 |
| ENSG00000207975 | 693192    | <i>MIR607</i>    | 10q24.1    | -3.12 | 6.66E-03 |
| ENSG00000230993 | 100462812 | <i>FGFR3P1</i>   | 6p21.33    | 3.10  | 6.86E-03 |
| ENSG00000224186 | ---       | NA               | NA         | -3.10 | 6.88E-03 |
| ENSG00000230280 | 101929589 | <i>RPL7P61</i>   | 2q24.3     | -3.10 | 6.93E-03 |
| ENSG00000255107 | ---       | NA               | NA         | -3.09 | 7.02E-03 |
| ENSG00000197635 | 5275      | <i>SERPINB13</i> | 18q21.33   | 3.09  | 7.09E-03 |
| ENSG00000149927 | 8479      | <i>HIRIP3</i>    | 16p11.2    | -3.09 | 7.10E-03 |
| ENSG00000273142 | ---       | NA               | NA         | 3.08  | 7.18E-03 |
| ENSG00000187860 | 164118    | <i>TTC24</i>     | 1q22       | -3.08 | 7.21E-03 |
| ENSG00000275793 | 503841    | <i>DEFB106B</i>  | 8p23.1     | 3.07  | 7.28E-03 |
| ENSG00000172399 | 171024    | <i>SYNPO2</i>    | 4q26       | -3.07 | 7.31E-03 |



|                 |           |                  |               |       |          |
|-----------------|-----------|------------------|---------------|-------|----------|
| ENSG00000238460 | 100147762 | <i>RNU7-14P</i>  | 20q13.2       | -3.07 | 7.31E-03 |
| ENSG00000144648 | 729085    | <i>GASK1A</i>    | 3p22.1        | 3.07  | 7.40E-03 |
| ENSG00000069018 | 375449    | <i>MAST4</i>     | 5q12.3        | 3.07  | 7.43E-03 |
| ENSG00000161682 | 80174     | <i>DBF4B</i>     | 17q21.31      | -3.06 | 7.48E-03 |
| ENSG00000134339 | 63982     | <i>ANO3</i>      | 11p14.3-p14.2 | 3.06  | 7.48E-03 |
| ENSG00000089847 | 55760     | <i>DHX32</i>     | 10q26.2       | -3.06 | 7.50E-03 |
| ENSG00000260442 | ---       | NA               | NA            | 3.06  | 7.52E-03 |
| ENSG00000236269 | 10211     | <i>FLOT1</i>     | 6p21.33       | -3.05 | 7.59E-03 |
| ENSG00000138135 | 10660     | <i>LBX1</i>      | 10q24.32      | -3.05 | 7.71E-03 |
| ENSG00000101188 | 55257     | <i>MRGBP</i>     | 20q13.33      | -3.04 | 7.75E-03 |
| ENSG00000239570 | 28881     | <i>IGKV2D-30</i> | 2p11.2        | 3.04  | 7.82E-03 |
| ENSG00000105963 | 22797     | <i>TFEC</i>      | 7q31.2        | -3.04 | 7.82E-03 |
| ENSG00000117481 | 50999     | <i>TMED5</i>     | 1p22.1        | -3.04 | 7.87E-03 |
| ENSG00000086717 | 7462      | <i>LAT2</i>      | 7q11.23       | -3.04 | 7.88E-03 |
| ENSG00000205238 | 26637     | <i>OR7E36P</i>   | 13q14.11      | -3.03 | 7.93E-03 |
| ENSG00000184774 | 644538    | <i>SMIM10</i>    | Xq26.3        | -3.03 | 8.04E-03 |
| ENSG00000251136 | 646641    | <i>RPL7L1P7</i>  | 3q23          | -3.02 | 8.15E-03 |
| ENSG00000145194 | 90113     | <i>VWA5B2</i>    | 3q27.1        | -3.02 | 8.15E-03 |
| ENSG00000205037 | 93035     | <i>PKHD1L1</i>   | 8q23.1-q23.2  | -3.02 | 8.21E-03 |
| ENSG00000030304 | 22807     | <i>IKZF2</i>     | 2q34          | -3.01 | 8.38E-03 |
| ENSG00000254701 | ---       | NA               | NA            | 3.01  | 8.40E-03 |
| ENSG00000156463 | 392255    | <i>GDF6</i>      | 8q22.1        | 3.01  | 8.40E-03 |
| ENSG00000114023 | 4968      | <i>OGG1</i>      | 3p25.3        | -3.01 | 8.41E-03 |
| ENSG00000181513 | ---       | NA               | NA            | 3.00  | 8.42E-03 |
| ENSG00000183549 | 399814    | <i>C10orf120</i> | 10q26.13      | -3.00 | 8.49E-03 |
| ENSG00000239983 | 106479377 | <i>RN7SL420P</i> | 1p13.1        | -3.00 | 8.50E-03 |
| ENSG00000136463 | 55852     | <i>TEX2</i>      | 17q23.3       | -3.00 | 8.53E-03 |
| ENSG00000226491 | 51596     | <i>CUTA</i>      | 6p21.32       | -3.00 | 8.58E-03 |
| ENSG00000228036 | ---       | NA               | NA            | 2.99  | 8.72E-03 |
| ENSG00000188167 | 199777    | <i>ZNF626</i>    | 19p12         | -2.98 | 8.85E-03 |
| ENSG00000114698 | 51409     | <i>HEMK1</i>     | 3p21.31       | 2.98  | 8.88E-03 |
| ENSG00000187800 | 65243     | <i>ZFP69B</i>    | 1p34.2        | 2.98  | 8.89E-03 |
| ENSG00000207627 | 723779    | <i>MIR651</i>    | Xp22.31       | -2.98 | 8.95E-03 |
| ENSG00000275882 | ---       | NA               | NA            | -2.97 | 8.98E-03 |
| ENSG00000217557 | 22815     | <i>TDGF1P4</i>   | 6p25.2        | 2.96  | 9.30E-03 |
| ENSG00000121057 | 8161      | <i>COIL</i>      | 17q22         | -2.96 | 9.31E-03 |
| ENSG00000228192 | 100462876 | <i>ELOCP14</i>   | Yq11.222      | -2.95 | 9.35E-03 |
| ENSG00000226800 | 100874388 | <i>OSTCP8</i>    | 9p13.3        | -2.95 | 9.38E-03 |
| ENSG00000090776 | 55066     | <i>PDPR</i>      | 16q22.1       | -2.95 | 9.38E-03 |
| ENSG00000267691 | 163088    | <i>TAF9P3</i>    | 19q12         | -2.95 | 9.47E-03 |
| ENSG00000229608 | 106146146 | <i>LINC01079</i> | 13q12.2       | -2.94 | 9.55E-03 |
| ENSG00000137040 | 64425     | <i>POLR1E</i>    | 9p13.2        | 2.94  | 9.56E-03 |

|                 |           |                    |          |       |          |
|-----------------|-----------|--------------------|----------|-------|----------|
| ENSG00000113966 | 27031     | <i>NPHP3</i>       | 3q22.1   | 2.94  | 9.57E-03 |
| ENSG00000216802 | ---       | NA                 | NA       | -2.94 | 9.59E-03 |
| ENSG00000235514 | 106480731 | <i>C6orf47-AS1</i> | 6p21.33  | -2.94 | 9.60E-03 |
| ENSG00000168061 | 116071    | <i>BATF2</i>       | 11q13.1  | -2.94 | 9.63E-03 |
| ENSG00000264994 | ---       | NA                 | NA       | -2.94 | 9.63E-03 |
| ENSG00000163519 | 2199      | <i>FBLN2</i>       | 3p25.1   | -2.94 | 9.73E-03 |
| ENSG00000227972 | 728758    | <i>PIN4P1</i>      | 15q15.3  | 2.93  | 9.75E-03 |
| ENSG00000155090 | 5799      | <i>PTPRN2</i>      | 7q36.3   | 2.93  | 9.77E-03 |
| ENSG00000196860 | 285190    | <i>RGPD4</i>       | 2q12.3   | 2.93  | 9.79E-03 |
| ENSG00000165868 | 414241    | <i>SHLD2P1</i>     | 10q11.22 | 2.93  | 9.87E-03 |
| ENSG00000166246 | 79827     | <i>CLMP</i>        | 11q24.1  | 2.93  | 9.88E-03 |
| ENSG00000264311 | 106481853 | <i>RN7SL644P</i>   | 10q23.33 | 2.93  | 9.89E-03 |
| ENSG00000188428 | ---       | NA                 | NA       | 2.92  | 9.96E-03 |
| ENSG0000026652  | 57823     | <i>SLAMF7</i>      | 1q23.3   | -2.92 | 9.96E-03 |

**Table S3.** Connectivity Map compounds with negative connectivity scores less than -50 in CAMP

| Score  | Broad ID      | Name                           | Description                                |
|--------|---------------|--------------------------------|--------------------------------------------|
| -50.25 | BRD-A81233518 | glycopyrrolate                 | Acetylcholine receptor antagonist          |
| -50.42 | BRD-A38749782 | fludrocortisone                | Glucocorticoid receptor agonist            |
| -50.53 | BRD-K37206356 | rhamnetin                      | HDAC inhibitor                             |
| -50.67 | BRD-A65767837 | hydrocortisone                 | Glucocorticoid receptor agonist            |
| -50.69 | BRD-K45401373 | betulinic-acid                 | Apoptosis stimulant                        |
| -51.30 | BRD-K92778217 | mefenamic-acid                 | Cyclooxygenase inhibitor                   |
| -51.38 | BRD-A41722204 | sulmazole                      | Adenosine receptor antagonist              |
| -51.72 | BRD-K46384212 | o-3M3FBS                       | phospholipase activator                    |
| -51.73 | BRD-M45964048 | verteporfin                    | Photosensitizing agent                     |
| -51.73 | BRD-A01346607 | flumetasone                    | Glucocorticoid receptor agonist            |
| -51.98 | BRD-K87919739 | tyrphostin-AG-825              | Receptor tyrosine protein kinase inhibitor |
| -52.13 | BRD-K97810537 | beclometasone                  | Glucocorticoid receptor agonist            |
| -52.16 | BRD-K86887724 | dofetilide                     | Potassium channel blocker                  |
| -52.31 | BRD-K59469039 | AG-879                         | Angiogenesis inhibitor                     |
| -52.33 | BRD-K86958018 | olvanil                        | TRPV agonist                               |
| -52.50 | BRD-A96255180 | ribavirin                      | Antiviral                                  |
| -52.83 | BRD-K05464208 | JX-401                         | p38 MAPK inhibitor                         |
| -52.97 | BRD-A04756508 | norgestimate                   | Progesterone receptor agonist              |
| -53.06 | BRD-K92301463 | 16,16-dimethylprostaglandin-e2 | Prostanoid receptor agonist                |
| -53.25 | BRD-A03623303 | metoprolol                     | Adrenergic receptor antagonist             |
| -53.43 | BRD-A51182606 | chloramphenicol                | Protein synthesis inhibitor                |
| -53.57 | BRD-A04352665 | maraviroc                      | CC chemokine receptor antagonist           |
| -53.63 | BRD-K70557564 | zosuquidar                     | P-glycoprotein inhibitor                   |
| -53.74 | BRD-A72988804 | tiaprofenic-acid               | Cyclooxygenase inhibitor                   |
| -53.84 | BRD-A68723818 | brompheniramine                | Histamine receptor antagonist              |
| -54.16 | BRD-K69688083 | mestinson                      | Cholinesterase inhibitor                   |

|        |               |                                  |                                                 |
|--------|---------------|----------------------------------|-------------------------------------------------|
| -54.44 | BRD-K17674993 | diflorasone                      | Corticosteroid agonist                          |
| -54.46 | BRD-A65597028 | RX-821002                        | Adrenergic receptor antagonist                  |
| -54.53 | BRD-A65550283 | ginsenoside                      | Steroid hormone receptor agonist                |
| -54.68 | BRD-K74430258 | 1,2-dichlorobenzene              | Hepatotoxicant                                  |
| -55.04 | BRD-K71926323 | marbofloxacin                    | Bacterial DNA gyrase inhibitor                  |
| -55.18 | BRD-K68873215 | phosphodiesterase-V-inhibitor-II | Phosphodiesterase inhibitor                     |
| -55.23 | BRD-K37792168 | denbufylline                     | Phosphodiesterase inhibitor                     |
| -55.40 | BRD-A55594068 | vinblastine                      | Microtubule inhibitor                           |
| -55.81 | BRD-K53318339 | vinpocetine                      | Phosphodiesterase inhibitor                     |
| -55.87 | BRD-K87158025 | benzamil                         | Sodium channel blocker                          |
| -55.96 | BRD-K97056771 | HY-11007                         | BCR-ABL kinase inhibitor                        |
| -55.99 | BRD-A25067867 | benzatropine                     | Acetylcholine receptor antagonist               |
| -56.03 | BRD-K77998258 | ganglioside                      | SRC activator                                   |
| -56.28 | BRD-K23583188 | lavendustin-a                    | EGFR inhibitor                                  |
| -56.48 | BRD-A17065207 | brefeldin-a                      | Protein synthesis inhibitor                     |
| -56.49 | BRD-K21565985 | xylazine                         | Adrenergic receptor agonist                     |
| -56.50 | BRD-A75935363 | atracurium                       | Acetylcholine receptor antagonist               |
| -57.04 | BRD-A39522003 | OMDM-2                           | FAAH inhibitor                                  |
| -57.17 | BRD-K70241288 | L-692585                         | Growth hormone releasing peptide ligand agonist |
| -57.19 | BRD-A69960130 | bromocriptine                    | Dopamine receptor agonist                       |
| -57.34 | BRD-K11634954 | GBR-13069                        | Dopamine uptake inhibitor                       |
| -57.39 | BRD-A15034104 | bergenin                         | Interleukin inhibitor                           |
| -57.45 | BRD-K41868777 | W-5                              | Calmodulin antagonist                           |
| -57.64 | BRD-A43974499 | reboxetine                       | Adrenergic receptor antagonist                  |
| -57.66 | BRD-K95885906 | quercetagenin                    | PIM inhibitor                                   |
| -57.70 | BRD-A16332958 | modafinil                        | Adrenergic receptor agonist                     |
| -57.95 | BRD-K63874012 | thiopramide                      | Histamine receptor antagonist                   |
| -58.13 | BRD-K75532464 | FTI-276                          | Farnesyltransferase inhibitor                   |

|        |               |                     |                                            |
|--------|---------------|---------------------|--------------------------------------------|
| -58.36 | BRD-K37848908 | ceforanide          | Penicillin binding protein inhibitor       |
| -58.41 | BRD-K18787491 | U-0126              | MEK inhibitor                              |
| -58.66 | BRD-K62056274 | quipazine           | Serotonin receptor agonist                 |
| -58.77 | BRD-K67445247 | flurofamide         | Urease inhibitor                           |
| -58.89 | BRD-K82561139 | ricinine            | Casein kinase inhibitor                    |
| -58.98 | BRD-A13946108 | sulindac            | Cyclooxygenase inhibitor                   |
| -58.98 | BRD-A92630576 | trimebutine         | Opioid receptor agonist                    |
| -58.99 | BRD-A89175223 | bisoprolol          | Adrenergic receptor antagonist             |
| -59.28 | BRD-K49372556 | mofezolac           | Cyclooxygenase inhibitor                   |
| -59.30 | BRD-K10176267 | L-701252            | Glutamate receptor antagonist              |
| -59.37 | BRD-K00675675 | CL-82198            | Metalloproteinase inhibitor                |
| -59.41 | BRD-K04111260 | raclopride          | Dopamine receptor antagonist               |
| -59.58 | BRD-K06208435 | YS-035              | Calcium channel blocker                    |
| -59.67 | BRD-K43764301 | dexketoprofen       | Cyclooxygenase inhibitor                   |
| -59.72 | BRD-K63533170 | AM-630              | Cannabinoid receptor antagonist            |
| -59.94 | BRD-K85383046 | IAA-94              | Chloride channel blocker                   |
| -59.95 | BRD-A96897502 | U-74389F            | Lipid peroxidase inhibitor                 |
| -60.01 | BRD-K13664374 | dichloroacetic-acid | Pyruvate dehydrogenase kinase inhibitor    |
| -60.05 | BRD-K54708045 | nTZDpa              | PPAR receptor agonist                      |
| -60.18 | BRD-K53857191 | risperidone         | Dopamine receptor antagonist               |
| -60.28 | BRD-K48869804 | icilin              | TRPV agonist                               |
| -60.56 | BRD-K05181084 | NGB-2904            | Dopamine receptor antagonist               |
| -60.67 | BRD-K43860855 | iobenguane          | Antineoplastic                             |
| -60.76 | BRD-K11129031 | gemfibrozil         | Lipoprotein lipase activator               |
| -60.86 | BRD-K49945136 | GR-113808           | Serotonin receptor antagonist              |
| -60.92 | BRD-K81729199 | AQ-RA741            | Acetylcholine receptor antagonist          |
| -61.00 | BRD-K40619305 | larixinic-acid      | Compound that interacts with metal centers |
| -61.37 | BRD-K11801786 | trimidox            | Ribonucleotide reductase inhibitor         |

|        |               |                              |                                                      |
|--------|---------------|------------------------------|------------------------------------------------------|
| -61.37 | BRD-A89337244 | PD-102807                    | Acetylcholine receptor antagonist                    |
| -61.46 | BRD-A29644307 | nomifensine                  | Dopamine uptake inhibitor                            |
| -61.63 | BRD-K03600606 | catechin                     | Beta secretase inhibitor                             |
| -61.73 | BRD-K36965586 | m-chlorophenylbiguanide      | Serotonin receptor agonist                           |
| -61.75 | BRD-A67799922 | phenoxybenzamine             | Adrenergic receptor antagonist                       |
| -61.93 | BRD-K60770992 | pergolide                    | Dopamine receptor agonist                            |
| -62.03 | BRD-A90799790 | isradipine                   | Calcium channel blocker                              |
| -62.35 | BRD-K07220430 | cinnarizine                  | Calcium channel blocker                              |
| -62.36 | BRD-K39733634 | L-161982                     | Prostanoid receptor antagonist                       |
| -62.83 | BRD-K27351809 | nomegestrol                  | Progesterone receptor agonist                        |
| -62.97 | BRD-K01095011 | finasteride                  | 5-alpha reductase inhibitor                          |
| -63.46 | BRD-A41555725 | chlortetracycline            | Protein synthesis inhibitor                          |
| -63.63 | BRD-A35108200 | dexamethasone                | Glucocorticoid receptor agonist                      |
| -63.65 | BRD-K92731339 | perindopril                  | ACE inhibitor                                        |
| -63.78 | BRD-K84266862 | BRL-50481                    | Phosphodiesterase inhibitor                          |
| -63.85 | BRD-A98299281 | velnacrine                   | cholinesterase inhibitor                             |
| -63.90 | BRD-A45140972 | meclocycline                 | Bacterial 30S ribosomal subunit inhibitor            |
| -64.10 | BRD-U97083655 | teicoplanin                  | Bacterial cell wall synthesis inhibitor              |
| -64.13 | BRD-K91696562 | orantinib                    | FGFR inhibitor                                       |
| -64.20 | BRD-K62982419 | cilomilast                   | Phosphodiesterase inhibitor                          |
| -64.30 | BRD-K41170226 | deoxycholic-acid             | G protein-coupled receptor agonist                   |
| -64.59 | BRD-K61401890 | deguelin                     | NADH-ubiquinone oxidoreductase (Complex I) inhibitor |
| -64.63 | BRD-K09859624 | methantheline                | Acetylcholine receptor antagonist                    |
| -64.90 | BRD-K32318651 | acyclovir                    | DNA polymerase inhibitor                             |
| -64.91 | BRD-A15131297 | benazepril                   | ACE inhibitor                                        |
| -65.03 | BRD-K43796186 | benzyl-quinazolin-4-yl-amine | EGFR inhibitor                                       |
| -65.27 | BRD-K01253243 | SB-590885                    | RAF inhibitor                                        |
| -65.34 | BRD-K62996583 | lidoflazine                  | Calcium channel blocker                              |

|        |               |                      |                                                  |
|--------|---------------|----------------------|--------------------------------------------------|
| -65.63 | BRD-A79314293 | cephalosporanic-acid | Bacterial cell wall synthesis inhibitor          |
| -65.92 | BRD-K69328504 | L-690488             | Inositol monophosphatase inhibitor               |
| -66.01 | BRD-K56064827 | EI-273               | PKC inhibitor                                    |
| -66.20 | BRD-K02123250 | JNJ-38877605         | Tyrosine kinase inhibitor                        |
| -66.87 | BRD-A07780951 | orciprenaline        | Adrenergic receptor agonist                      |
| -67.02 | BRD-K76908866 | CP-724714            | EGFR inhibitor                                   |
| -67.07 | BRD-K81209159 | herniarin            | Acetylcholinesterase inhibitor                   |
| -67.08 | BRD-K63151507 | MNITMT               | Lymphocyte inhibitor                             |
| -67.10 | BRD-A32164164 | methyllycaconitine   | Acetylcholine receptor antagonist                |
| -67.11 | BRD-K28143534 | cyproheptadine       | Histamine receptor antagonist                    |
| -67.52 | BRD-A31312900 | montelukast          | Leukotriene receptor antagonist                  |
| -67.75 | BRD-A97104540 | fenoterol            | Adrenergic receptor agonist                      |
| -68.07 | BRD-K93188295 | ARC-239              | Adrenergic receptor antagonist                   |
| -68.27 | BRD-K46424862 | hymecromone          | Monoamine oxidase inhibitor                      |
| -68.44 | BRD-K29359156 | ebesen               | H <sup>+</sup> /K <sup>+</sup> -ATPase inhibitor |
| -68.48 | BRD-K26573499 | DMAB-anabaseine      | Adrenergic receptor agonist                      |
| -68.50 | BRD-K89152108 | liothyronine         | Thyroid hormone stimulant                        |
| -68.73 | BRD-A99411506 | esculin              | Antioxidant                                      |
| -68.92 | BRD-K88868628 | iodoacetic-acid      | Cysteine peptidase inhibitor                     |
| -68.97 | BRD-K14681867 | somatostatin         | Somatostatin receptor agonist                    |
| -69.16 | BRD-A12016240 | LY-278584            | Serotonin receptor antagonist                    |
| -69.53 | BRD-K96319534 | phentermine          | Dopamine uptake inhibitor                        |
| -69.56 | BRD-K00184207 | GR-206               | Aryl hydrocarbon receptor ligand                 |
| -69.60 | BRD-A49765801 | fludrocortide        | Glucocorticoid receptor agonist                  |
| -69.61 | BRD-K94887716 | TFMPP                | Serotonin receptor agonist                       |
| -70.20 | BRD-K81473089 | tacrine              | Acetylcholinesterase inhibitor                   |
| -70.41 | BRD-A12560204 | nitrendipine         | Calcium channel blocker                          |
| -70.52 | BRD-A85280935 | quinpirole           | Dopamine receptor agonist                        |

|        |               |                       |                                               |
|--------|---------------|-----------------------|-----------------------------------------------|
| -70.69 | BRD-A27143604 | DPN                   | Estrogen receptor agonist                     |
| -70.78 | BRD-K02867583 | minaprine             | Serotonin reuptake inhibitor                  |
| -71.26 | BRD-K66707493 | lawsone               | Coloring agent                                |
| -71.37 | BRD-K32526544 | DCEBIO                | Potassium channel activator                   |
| -71.68 | BRD-K67680372 | CI-966                | GAT inhibitor                                 |
| -72.04 | BRD-K07881437 | danusertib            | Aurora kinase inhibitor                       |
| -72.31 | BRD-K09963420 | saquinavir            | HIV protease inhibitor                        |
| -72.33 | BRD-K13927029 | retinol               | Retinoid receptor ligand                      |
| -72.42 | BRD-K73109821 | diazoxide             | Potassium channel activator                   |
| -72.47 | BRD-K34441861 | moexipril             | ACE inhibitor                                 |
| -72.52 | BRD-K16508793 | diazepam              | Benzodiazepine receptor agonist               |
| -72.55 | BRD-K42452249 | EO-1428               | p38 MAPK inhibitor                            |
| -72.61 | BRD-K09635134 | l-erythro-MAPP        | negative control for D-erythro-MAPP           |
| -72.67 | BRD-K86727142 | embelin               | HCV inhibitor                                 |
| -72.68 | BRD-K01436366 | XMD-1150              | Leucine rich repeat kinase inhibitor          |
| -72.9  | BRD-K88568253 | iproniazid            | Monoamine oxidase inhibitor                   |
| -73.00 | BRD-K40990712 | hexamethylenamiloride | Sodium/hydrogen antiport inhibitor            |
| -73.00 | BRD-K46766488 | S-14506               | Serotonin receptor agonist                    |
| -73.17 | BRD-A25234499 | aminoglutethimide     | Glucocorticoid receptor antagonist            |
| -73.74 | BRD-A93255169 | thalidomide           | TNF production inhibitor                      |
| -74.22 | BRD-K60762818 | desipramine           | Tricyclic antidepressant                      |
| -74.25 | BRD-K14965640 | ibuprofen             | Cyclooxygenase inhibitor                      |
| -74.30 | BRD-A31159102 | fluoxetine            | Selective serotonin reuptake inhibitor (SSRI) |
| -74.51 | BRD-K25310650 | ormetoprim            | Bacterial antifolate                          |
| -74.67 | BRD-A46179541 | doxapram              | Potassium channel blocker                     |
| -74.89 | BRD-A00267231 | hemado                | Adenosine receptor agonist                    |
| -75.20 | BRD-K26548821 | quinpirole            | Dopamine receptor agonist                     |
| -76.57 | BRD-K52394958 | GR-159897             | Tachykinin antagonist                         |



|        |               |                                      |                                           |
|--------|---------------|--------------------------------------|-------------------------------------------|
| -76.74 | BRD-A10903566 | imiloxan                             | Adrenergic receptor antagonist            |
| -76.77 | BRD-K23204545 | busulfan                             | DNA inhibitor                             |
| -77.09 | BRD-A00993607 | alprenolol                           | Adrenergic receptor antagonist            |
| -77.11 | BRD-K53561341 | KIN001-220                           | Aurora kinase inhibitor                   |
| -77.32 | BRD-K14643723 | 4-(2-Amino-ethyl)-benzenesulfonamide | carbonic anhydrase inhibitor              |
| -77.35 | BRD-K65814004 | diphenylethylidenehydrazide          | Nitric oxide synthase inhibitor           |
| -77.35 | BRD-U94846492 | quinine                              | Hemozoin biocrystallization inhibitor     |
| -77.37 | BRD-K66944906 | fraxidin                             | Carbonic anhydrase inhibitor              |
| -77.53 | BRD-K38305202 | domperidone                          | Dopamine receptor antagonist              |
| -77.55 | BRD-K39569857 | avrainvillamide-analog-3             | nucleophosmin inhibitor                   |
| -77.70 | BRD-K39339537 | epirizole                            | Cyclooxygenase inhibitor                  |
| -77.73 | BRD-K58299615 | RO-90-7501                           | Beta amyloid inhibitor                    |
| -78.56 | BRD-K33882852 | ZK-93423                             | Benzodiazepine receptor agonist           |
| -78.72 | BRD-K78485176 | olmesartan                           | Angiotensin receptor antagonist           |
| -78.82 | BRD-K85133207 | HDAC1-selective                      | HDAC inhibitor                            |
| -78.83 | BRD-K02404261 | caffeine                             | Adenosine receptor antagonist             |
| -78.90 | BRD-K43330982 | JTE-013                              | Lysophospholipid receptor antagonist      |
| -78.98 | BRD-K26669427 | WR-216174                            | PFMRK inhibitor                           |
| -79.02 | BRD-A27489425 | rolitetracycline                     | Bacterial 30S ribosomal subunit inhibitor |
| -79.32 | BRD-K71035033 | masitinib                            | KIT inhibitor                             |
| -79.35 | BRD-K40227168 | vinburnine                           | Adrenergic receptor antagonist            |
| -79.38 | BRD-K54210043 | NS-1619                              | Calcium channel activator                 |
| -79.52 | BRD-K99595596 | salsolinol                           | Monoamine oxidase inhibitor               |
| -79.60 | BRD-A75455249 | kavain                               | Calcium channel modulator                 |
| -79.72 | BRD-A95696066 | nisoxetine                           | Norepinephrine reuptake inhibitor         |
| -79.74 | BRD-K28761384 | zuclopenthixol                       | Dopamine receptor antagonist              |
| -79.74 | BRD-K15791587 | L-733060                             | Tachykinin antagonist                     |
| -79.93 | BRD-A80638690 | floxuridine                          | DNA synthesis inhibitor                   |

|        |               |                     |                                         |
|--------|---------------|---------------------|-----------------------------------------|
| -80.22 | BRD-K67043667 | altretamine         | DNA synthesis inhibitor                 |
| -80.33 | BRD-K08109516 | L-701324            | Glutamate receptor antagonist           |
| -80.62 | BRD-A15297126 | fluocinonide        | Glucocorticoid receptor agonist         |
| -80.76 | BRD-K21733600 | rofecoxib           | Cyclooxygenase inhibitor                |
| -81.34 | BRD-K53913732 | SB-408124           | Orexin receptor antagonist              |
| -81.63 | BRD-A33447119 | oxfendazole         | Anthelmintic                            |
| -81.67 | BRD-A26711594 | nicardipine         | Calcium channel blocker                 |
| -81.93 | BRD-K70327191 | benzoxiquine        | Anti-infective                          |
| -82.06 | BRD-K29173907 | isoflupredone       | Glucocorticoid receptor agonist         |
| -82.26 | BRD-K90543092 | levonorgestrel      | Estrogen receptor agonist               |
| -82.65 | BRD-A34706053 | CGP-12177           | Adrenergic receptor agonist             |
| -82.85 | BRD-K28667793 | pyrazinamide        | Fatty acid synthase inhibitor           |
| -83.10 | BRD-A79237180 | ascorbic-acid       | Antioxidant                             |
| -83.72 | BRD-K82983861 | GW-0742             | PPAR receptor agonist                   |
| -84.17 | BRD-K30743633 | TCPOBOP             | CAR agonist                             |
| -84.20 | BRD-K57631554 | aminolevulinic-acid | Oxidizing agent                         |
| -84.35 | BRD-K25224017 | pirenperone         | Serotonin receptor antagonist           |
| -84.56 | BRD-A16665823 | butoconazole        | Bacterial cell wall synthesis inhibitor |
| -84.81 | BRD-K75641298 | metoclopramide      | Dopamine receptor antagonist            |
| -85.00 | BRD-A65013509 | oxybutynin          | Acetylcholine receptor antagonist       |
| -86.00 | BRD-A83326220 | brazilin            | Nitric oxide production inhibitor       |
| -86.28 | BRD-K70505054 | ranitidine          | Histamine receptor antagonist           |
| -86.41 | BRD-K71860425 | CDK2-5-inhibitor    | CDK inhibitor                           |
| -86.52 | BRD-A87719232 | naproxen            | Cyclooxygenase inhibitor                |
| -86.59 | BRD-A73741725 | exemestane          | Aromatase inhibitor                     |
| -86.81 | BRD-K74913225 | brinzolamide        | Carbonic anhydrase inhibitor            |
| -87.45 | BRD-K33308633 | INCA-6              | Calcineurin inhibitor                   |
| -87.89 | BRD-K50388907 | fenofibrate         | PPAR receptor agonist                   |

|        |               |                    |                                                   |
|--------|---------------|--------------------|---------------------------------------------------|
| -87.89 | BRD-K65331431 | retinyl            | vitamin analog                                    |
| -88.17 | BRD-K45435259 | SCH-23390          | Dopamine receptor antagonist                      |
| -88.38 | BRD-K12994359 | valdecoxib         | Cyclooxygenase inhibitor                          |
| -88.58 | BRD-K12260308 | xanthoxylone       | Antifungal                                        |
| -88.76 | BRD-A16478930 | amcinonide         | Glucocorticoid receptor agonist                   |
| -89.36 | BRD-K63979671 | etifenin           | Compound used in hepatobiliary scans of the liver |
| -89.39 | BRD-K02590140 | O-2050             | Cannabinoid receptor antagonist                   |
| -90.07 | BRD-A55393291 | testosterone       | Androgen receptor agonist                         |
| -90.08 | BRD-K32107296 | temozolomide       | DNA alkylating agent                              |
| -90.33 | BRD-A94543220 | bifonazole         | Sterol demethylase inhibitor                      |
| -90.39 | BRD-K19533706 | tranilast          | Angiogenesis inhibitor                            |
| -90.55 | BRD-K76064317 | tyrphostin-AG-1296 | FLT3 inhibitor                                    |
| -90.68 | BRD-A62035778 | scopolamine        | Acetylcholine receptor antagonist                 |
| -90.70 | BRD-K44899736 | RO-16-6941         | Monoamine oxidase inhibitor                       |
| -90.71 | BRD-A91866971 | SQ-29548           | Thromboxane receptor antagonist                   |
| -90.92 | BRD-K81521265 | dicyclohexylurea   | Epoxide hydrolase inhibitor                       |
| -91.07 | BRD-K37618799 | MRS-1220           | Adenosine receptor antagonist                     |
| -91.92 | BRD-K39391626 | ethylestrenol      | Progesterone receptor agonist                     |
| -92.17 | BRD-K78692225 | leflunomide        | Dihydroorotate dehydrogenase inhibitor            |
| -92.65 | BRD-K32645441 | dipropyl-5ct       | Serotonin receptor agonist                        |
| -92.76 | BRD-A03216249 | mepivacaine        | Potassium channel blocker                         |
| -92.78 | BRD-K91601245 | mercaptopurine     | Immunosuppressant                                 |
| -93.01 | BRD-K10177585 | PSB-11             | Adenosine receptor antagonist                     |
| -93.45 | BRD-A07395371 | esmolol            | Adrenergic receptor antagonist                    |
| -93.52 | BRD-K87991767 | umbelliferone      | Cyclooxygenase inhibitor                          |
| -93.70 | BRD-K27141178 | SB-203186          | Serotonin receptor antagonist                     |
| -94.11 | BRD-A35338386 | NECA               | Adenosine receptor agonist                        |
| -94.68 | BRD-K51751936 | alfadolone         | GABA receptor agonist                             |

|        |               |                      |                                                 |
|--------|---------------|----------------------|-------------------------------------------------|
| -94.78 | BRD-K18059238 | gamma-linolenic-acid | Anti-inflammatory omega-6 fatty acid            |
| -94.87 | BRD-A64227845 | SKF-77434            | Dopamine receptor agonist                       |
| -95.00 | BRD-K68756823 | FR-180204            | Selective ERK inhibitor                         |
| -95.07 | BRD-K01555864 | dibenzoylmethane     | Antineoplastic                                  |
| -95.36 | BRD-K34098590 | tienilic-acid        | Sodium/potassium/chloride transporter inhibitor |
| -95.67 | BRD-K64514229 | toltrazuril          | Antiprotozoal                                   |
| -95.68 | BRD-K67102207 | phenylbutyrate       | HDAC inhibitor                                  |
| -95.68 | BRD-K01648091 | LE-300               | Dopamine receptor antagonist                    |
| -96.08 | BRD-K96037667 | norethindrone        | Progesterone receptor agonist                   |
| -96.19 | BRD-A87606379 | nadolol              | Adrenergic receptor antagonist                  |
| -96.43 | BRD-K59633790 | VU-0420363-1         | SARS coronavirus 3C-like protease inhibitor     |
| -96.51 | BRD-K76534306 | enrofloxacin         | Bacterial DNA gyrase inhibitor                  |
| -96.72 | BRD-K49890030 | gavestinel           | Glutamate receptor antagonist                   |
| -96.81 | BRD-K06712146 | YM-90709             | IL5 inhibitor                                   |
| -97.07 | BRD-A01826957 | xanthinol            | Vasodilator                                     |
| -97.18 | BRD-A41833852 | naloxone             | Opioid receptor antagonist                      |
| -97.50 | BRD-K54529596 | captopril            | ACE inhibitor                                   |
| -97.60 | BRD-A16754160 | ampicillin           | Bacterial cell wall synthesis inhibitor         |
| -97.79 | BRD-K64310881 | MW-STK33-3B          | Potassium channel activator                     |
| -97.82 | BRD-K97509413 | coumestrol           | Estrogen receptor agonist                       |
| -97.98 | BRD-K90864987 | cobalt(II)-chloride  | HSP inducer                                     |
| -98.32 | BRD-K82941592 | rosuvastatin         | HMGCR inhibitor                                 |
| -98.57 | BRD-A02176148 | tubaic-acid          | Mitochondrial complex I inhibitor               |
| -98.70 | BRD-A04308630 | genipin              | Choleretic agent                                |
| -99.12 | BRD-K79602928 | metformin            | Insulin sensitizer                              |
| -99.31 | BRD-A71262238 | nafadotride          | Dopamine receptor antagonist                    |
| -99.61 | BRD-K10466330 | AVA                  | Nucleophosmin inhibitor                         |

**Table S4.** Connectivity Map compounds with negative connectivity scores less than -50 in SARP

| Score  | Broad ID      | Name                  | Description                                           |
|--------|---------------|-----------------------|-------------------------------------------------------|
| -50.08 | BRD-A26095496 | clobetasol            | Glucocorticoid receptor agonist                       |
| -50.46 | BRD-K74236984 | UNC-0321              | Histone lysine methyltransferase inhibitor            |
| -50.48 | BRD-K17896185 | FIT                   | Opioid receptor agonist                               |
| -50.57 | BRD-K10670311 | sulfasalazine         | Antirheumatic                                         |
| -50.65 | BRD-K47278471 | diphenhydramine       | Histamine receptor antagonist                         |
| -50.65 | BRD-M64432851 | sunitinib             | FLT3 inhibitor                                        |
| -50.92 | BRD-K43764301 | dexketoprofen         | Cyclooxygenase inhibitor                              |
| -50.97 | BRD-A23637604 | oxymetholone          | Androgen receptor agonist                             |
| -51.10 | BRD-K36740062 | GSK-1070916           | Aurora kinase inhibitor                               |
| -51.25 | BRD-K68190965 | GR-46611              | Serotonin receptor agonist                            |
| -51.29 | BRD-K63630713 | etacrynic-acid        | Sodium/potassium/chloride transporter inhibitor       |
| -51.34 | BRD-K26573499 | DMAB-anabaseine       | Adrenergic receptor agonist                           |
| -51.42 | BRD-K88304388 | dextrorphan           | Glutamate receptor antagonist                         |
| -51.47 | BRD-K26997899 | SA-792574             | Microtubule inhibitor                                 |
| -51.70 | BRD-K71926323 | marbofloxacin         | Bacterial DNA gyrase inhibitor                        |
| -51.96 | BRD-K24201553 | SB-269970             | Serotonin receptor antagonist                         |
| -52.10 | BRD-A12560204 | nitrendipine          | Calcium channel blocker                               |
| -52.28 | BRD-K43978949 | PIT                   | Purinergic receptor antagonist                        |
| -52.58 | BRD-K71534238 | GW-9508               | Free fatty acid receptor agonist                      |
| -52.87 | BRD-A36267905 | buphenine             | Adrenergic receptor agonist                           |
| -52.93 | BRD-A62809825 | thapsigargin          | ATPase inhibitor                                      |
| -53.08 | BRD-K93480852 | KN-93                 | Calcium-calmodulin dependent protein kinase inhibitor |
| -53.26 | BRD-A38747044 | KU-14R                | Imidazoline receptor ligand                           |
| -53.29 | BRD-K42142750 | retrorsine            | Antimitotic                                           |
| -53.38 | BRD-K86873305 | piperacillin          | Bacterial cell wall synthesis inhibitor               |
| -53.39 | BRD-A01295252 | trans-7-hydroxy-pipat | Dopamine receptor ligand                              |

|        |               |                          |                                         |
|--------|---------------|--------------------------|-----------------------------------------|
| -53.46 | BRD-K30697463 | desoximetasone           | Glucocorticoid receptor agonist         |
| -53.56 | BRD-A04327189 | synephrine               | Adrenergic receptor agonist             |
| -53.74 | BRD-K12513978 | fenbufen                 | Cyclooxygenase inhibitor                |
| -53.74 | BRD-K97764662 | PD-173074                | FGFR inhibitor                          |
| -54.17 | BRD-K54987996 | CAY-10578                | Casein kinase inhibitor                 |
| -54.25 | BRD-A41692738 | TGX-221                  | PI3K inhibitor                          |
| -54.39 | BRD-K88358234 | xaliproden               | Serotonin receptor agonist              |
| -54.45 | BRD-K09778810 | FGIN-1-27                | Inositol monophosphatase inhibitor      |
| -54.50 | BRD-K40578143 | GR-79236                 | Adenosine receptor agonist              |
| -54.69 | BRD-K92138166 | mammea-a                 | other antibiotic                        |
| -54.75 | BRD-K37194137 | III606050                | Cytochrome P450 inhibitor               |
| -54.91 | BRD-K24526313 | levcromakalim            | Potassium channel activator             |
| -54.92 | BRD-A82238138 | budesonide               | Glucocorticoid receptor agonist         |
| -54.97 | BRD-A61470182 | n-formylmethionylalanine | macrophage activator                    |
| -55.04 | BRD-K45988865 | tetramethylsilane        | Internal standard for NMR spectroscopy  |
| -55.04 | BRD-K59637651 | NSC-119889               | Protein synthesis inhibitor             |
| -55.26 | BRD-A34751532 | homosalate               | HSP inducer                             |
| -55.62 | BRD-A77050075 | heraclenol               | Vitamin K antagonist                    |
| -55.67 | BRD-A73859745 | glycodeoxycholic-acid    | Apoptosis stimulant                     |
| -55.76 | BRD-A13946108 | sulindac                 | Cyclooxygenase inhibitor                |
| -55.83 | BRD-A62021152 | WAY-161503               | Serotonin receptor agonist              |
| -55.85 | BRD-U37049823 | HG-6-64-01               | RAF inhibitor                           |
| -56.02 | BRD-A72441487 | stiripentol              | GABA uptake inhibitor                   |
| -56.12 | BRD-K51816706 | oxindole-I               | VEGFR inhibitor                         |
| -56.12 | BRD-U97083655 | teicoplanin              | Bacterial cell wall synthesis inhibitor |
| -56.22 | BRD-K77008974 | WYE-354                  | MTOR inhibitor                          |
| -56.43 | BRD-K56403959 | ZK-756326                | CC chemokine receptor ligand            |
| -56.45 | BRD-A71203467 | l-stepholidine           | Dopamine receptor antagonist            |

|        |               |                 |                                                                             |
|--------|---------------|-----------------|-----------------------------------------------------------------------------|
| -56.59 | BRD-A16754160 | ampicillin      | Bacterial cell wall synthesis inhibitor                                     |
| -56.65 | BRD-K22662435 | ganciclovir     | DNA polymerase inhibitor                                                    |
| -56.83 | BRD-K02130563 | panobinostat    | HDAC inhibitor                                                              |
| -56.89 | BRD-K03642198 | AY-9944         | Hedgehog pathway modulator                                                  |
| -56.90 | BRD-K18036262 | L-168049        | Glucagon receptor antagonist                                                |
| -56.97 | BRD-K05181463 | L-741626        | Dopamine receptor antagonist                                                |
| -57.23 | BRD-K57886322 | flucinonide     | Glucocorticoid receptor agonist                                             |
| -57.38 | BRD-A62182663 | YK-4279         | Apoptosis stimulant                                                         |
| -57.45 | BRD-A93255169 | thalidomide     | TNF production inhibitor                                                    |
| -58.07 | BRD-A39522003 | OMDM-2          | FAAH inhibitor                                                              |
| -58.22 | BRD-K35483542 | alitretinoin    | Retinoid receptor agonist                                                   |
| -58.49 | BRD-K63195589 | tipifarnib      | Farnesyltransferase inhibitor                                               |
| -58.59 | BRD-K17075857 | chloroxine      | Opioid receptor antagonist                                                  |
| -58.68 | BRD-A49765801 | fludroxycortide | Glucocorticoid receptor agonist                                             |
| -58.68 | BRD-K95655893 | MAZ-51          | VEGFR inhibitor                                                             |
| -58.71 | BRD-K91145395 | prostratin      | PKC activator                                                               |
| -59.04 | BRD-K21450440 | benzthiazide    | Carbonic anhydrase inhibitor                                                |
| -59.29 | BRD-K36009368 | NNC-63-0532     | Opioid receptor agonist                                                     |
| -59.37 | BRD-K26429091 | J-104129        | Acetylcholine receptor antagonist                                           |
| -59.40 | BRD-K74501079 | azithromycin    | Bacterial 50S ribosomal subunit inhibitor                                   |
| -59.71 | BRD-K01253243 | SB-590885       | RAF inhibitor                                                               |
| -59.99 | BRD-K06159959 | CCMQ            | Inhibitor of the binding of homoquinolinic acid to non-NMDA sensitive sites |
| -60.05 | BRD-K53959060 | indirubin       | CDK inhibitor                                                               |
| -60.31 | BRD-K76723084 | isotretinoin    | Retinoid receptor agonist                                                   |
| -60.38 | BRD-A31227688 | kynuramine      | Aryl hydrocarbon receptor activator                                         |
| -60.82 | BRD-K56957086 | dacinostat      | HDAC inhibitor                                                              |
| -61.00 | BRD-A01593789 | chlormadinone   | 5-alpha reductase inhibitor                                                 |
| -61.02 | BRD-K01567962 | pyrazolanthrone | JNK inhibitor                                                               |

|        |               |                        |                                            |
|--------|---------------|------------------------|--------------------------------------------|
| -61.10 | BRD-K67578145 | GDC-0879               | RAF inhibitor                              |
| -61.12 | BRD-A46179541 | doxapram               | Potassium channel blocker                  |
| -61.17 | BRD-A89337244 | PD-102807              | Acetylcholine receptor antagonist          |
| -61.48 | BRD-K12502280 | TG-101348              | FLT3 inhibitor                             |
| -61.75 | BRD-A28422058 | L-689560               | Glutamate receptor antagonist              |
| -61.77 | BRD-K08547377 | irinotecan             | Topoisomerase inhibitor                    |
| -61.79 | BRD-A37837077 | cyclazosin             | Adrenergic receptor antagonist             |
| -61.95 | BRD-K75699339 | rizatriptan            | Serotonin receptor agonist                 |
| -62.01 | BRD-A06390036 | hydroquinidine         | Antiarrhythmic                             |
| -62.17 | BRD-A18917088 | estradiol              | Contraceptive agent                        |
| -62.21 | BRD-K47869605 | podophyllotoxin        | Microtubule inhibitor                      |
| -62.39 | BRD-K29173907 | isoflupredone          | Glucocorticoid receptor agonist            |
| -62.55 | BRD-K71799949 | carbamazepine          | Carboxamide antiepileptic                  |
| -62.75 | BRD-K35458079 | edaravone              | Nootropic agent                            |
| -63.52 | BRD-A25576662 | streptozotocin         | DNA alkylating agent                       |
| -63.89 | BRD-K34330170 | rotenonic-acid         | Retinoid receptor antagonist               |
| -64.22 | BRD-K85925969 | zalcitabine            | Nucleoside reverse transcriptase inhibitor |
| -64.26 | BRD-K19284129 | salvinorin-a           | Opioid receptor agonist                    |
| -64.27 | BRD-K68202742 | trichostatin-a         | HDAC inhibitor                             |
| -64.58 | BRD-A41995253 | brucine                | Glycine receptor antagonist                |
| -65.00 | BRD-K28346421 | rifapentine            | RNA polymerase inhibitor                   |
| -65.00 | BRD-K36395411 | SB-206553              | Serotonin receptor antagonist              |
| -65.01 | BRD-K46862739 | metyrapone             | Cytochrome P450 inhibitor                  |
| -65.02 | BRD-K52751261 | TAK-715                | p38 MAPK inhibitor                         |
| -65.17 | BRD-A99833829 | bethanechol            | Acetylcholine receptor agonist             |
| -65.37 | BRD-K00610438 | altanserin             | Serotonin receptor antagonist              |
| -65.43 | BRD-K96527333 | dehydroisoandrosterone | GABA receptor modulator                    |
| -65.78 | BRD-A07000685 | hydrocortisone         | Glucocorticoid receptor agonist            |



|        |               |                |                                   |
|--------|---------------|----------------|-----------------------------------|
| -65.88 | BRD-K52620403 | STO-609        | Calmodulin antagonist             |
| -65.93 | BRD-K34437622 | BRD-K34437622  | Thymidylate synthase inhibitor    |
| -66.02 | BRD-K02283807 | GR-32191       | Thromboxane receptor antagonist   |
| -66.25 | BRD-A34208323 | VU-0404997-2   | Glutamate receptor modulator      |
| -66.33 | BRD-A15297126 | fluocinonide   | Glucocorticoid receptor agonist   |
| -66.82 | BRD-K64935403 | ebelactone-b   | Lipase inhibitor                  |
| -67.19 | BRD-K67439147 | SIB-1893       | Glutamate receptor antagonist     |
| -67.85 | BRD-K91900765 | VX-745         | p38 MAPK inhibitor                |
| -67.97 | BRD-K78633253 | EXO-1          | ARF inhibitor                     |
| -68.06 | BRD-A46186775 | hydrocortisone | Glucocorticoid receptor agonist   |
| -68.15 | BRD-K46211610 | tolazoline     | Adrenergic receptor antagonist    |
| -68.66 | BRD-K68065987 | MK-2206        | AKT inhibitor                     |
| -68.98 | BRD-A48720949 | testosterone   | androgen receptor agonist         |
| -69.06 | BRD-A61858259 | CAY-10415      | Insulin sensitizer                |
| -69.78 | BRD-A37492983 | iocetamic-acid | Radiopaque medium                 |
| -70.18 | BRD-K64052750 | gefitinib      | EGFR inhibitor                    |
| -70.31 | BRD-K74763371 | bosentan       | Endothelin receptor antagonist    |
| -70.40 | BRD-K17674993 | diflorasone    | Corticosteroid agonist            |
| -70.41 | BRD-K14807180 | SB-221284      | Serotonin receptor antagonist     |
| -70.61 | BRD-A92670106 | tocainide      | Sodium channel blocker            |
| -70.82 | BRD-K11634954 | GBR-13069      | Dopamine uptake inhibitor         |
| -70.93 | BRD-A45498368 | WYE-125132     | MTOR inhibitor                    |
| -71.08 | BRD-K63550407 | erythromycin   | NFkB pathway inhibitor            |
| -71.11 | BRD-K68507560 | dicycloverine  | Acetylcholine receptor antagonist |
| -71.25 | BRD-K32318651 | acyclovir      | DNA polymerase inhibitor          |
| -71.58 | BRD-K39983086 | loteprednol    | Glucocorticoid receptor agonist   |
| -71.63 | BRD-A20126139 | medrysone      | Glucocorticoid receptor agonist   |
| -72.69 | BRD-K45435259 | SCH-23390      | Dopamine receptor antagonist      |

|        |               |                     |                                              |
|--------|---------------|---------------------|----------------------------------------------|
| -72.78 | BRD-K26674531 | GR-235              | Estrogen receptor agonist                    |
| -72.93 | BRD-K97810537 | beclometasone       | Glucocorticoid receptor agonist              |
| -73.53 | BRD-K27184429 | levocetirizine      | Histamine receptor antagonist                |
| -73.65 | BRD-K10042277 | desmethyloclozapine | Acetylcholine receptor agonist               |
| -73.98 | BRD-K80725821 | RS-16566            | Serotonin receptor antagonist                |
| -74.02 | BRD-K93176058 | AC-55649            | Retinoid receptor agonist                    |
| -74.68 | BRD-K19111024 | clofibrlic-acid     | PPAR receptor agonist                        |
| -74.73 | BRD-K83637872 | SANT-1              | Smoothened receptor antagonist               |
| -75.00 | BRD-K17110974 | aristolochic-acid   | Phospholipase inhibitor                      |
| -75.15 | BRD-A84702196 | penicillin          | Bacterial cell wall synthesis inhibitor      |
| -75.32 | BRD-A37776212 | ICI-204448          | Opioid receptor agonist                      |
| -75.48 | BRD-K32164935 | tolazamide          | ATP channel blocker                          |
| -75.59 | BRD-A92439610 | triamcinolone       | Glucocorticoid receptor agonist              |
| -75.74 | BRD-K06335600 | tizanidine          | Adrenergic receptor agonist                  |
| -76.53 | BRD-A00520476 | otenzepad           | Acetylcholine receptor antagonist            |
| -76.57 | BRD-K66782112 | BRD-K66782112       | Histamine receptor antagonist                |
| -76.71 | BRD-K71035033 | masitinib           | KIT inhibitor                                |
| -76.71 | BRD-A70407468 | PSB-36              | Adenosine receptor antagonist                |
| -76.81 | BRD-A41301928 | bongkrek-acid       | Mitochondrial ADP, ATP translocase inhibitor |
| -76.83 | BRD-A55594068 | vinblastine         | Microtubule inhibitor                        |
| -77.03 | BRD-K85603128 | resorcinol          | Phosphodiesterase inhibitor                  |
| -77.33 | BRD-K62200014 | anagrelide          | Phosphodiesterase inhibitor                  |
| -77.62 | BRD-K35240538 | methylprednisolone  | Glucocorticoid receptor agonist              |
| -77.71 | BRD-K15592317 | CP466722            | ATM kinase inhibitor                         |
| -77.78 | BRD-K49668410 | clarithromycin      | Bacterial 50S ribosomal subunit inhibitor    |
| -78.14 | BRD-K64402243 | ivachtin            | Caspase inhibitor                            |
| -78.14 | BRD-K33308633 | INCA-6              | Calcineurin inhibitor                        |
| -78.68 | BRD-K97799481 | theophylline        | Adenosine receptor antagonist                |

|        |               |                          |                                        |
|--------|---------------|--------------------------|----------------------------------------|
| -78.90 | BRD-K88611939 | aniracetam               | Glutamate receptor agonist             |
| -79.01 | BRD-A75479906 | rimantadine              | Antiviral                              |
| -79.06 | BRD-A18043272 | phensuximide             | Succinimide antiepileptic              |
| -79.27 | BRD-A41145729 | methoprene-acid          | Retinoid receptor agonist              |
| -79.52 | BRD-K60640630 | mometasone               | Glucocorticoid receptor agonist        |
| -79.85 | BRD-K77286328 | reversine                | Aurora kinase inhibitor                |
| -79.96 | BRD-K00337317 | NU-7441                  | DNA dependent protein kinase inhibitor |
| -80.26 | BRD-K20152659 | gamma-homolinolenic-acid | Cholesterol inhibitor                  |
| -80.55 | BRD-K56596464 | QX-314                   | Sodium channel blocker                 |
| -80.65 | BRD-A31801025 | formestane               | Aromatase inhibitor                    |
| -80.68 | BRD-K25906698 | imnepip                  | Histamine receptor agonist             |
| -80.70 | BRD-K18059238 | gamma-linolenic-acid     | Anti-inflammatory omega-6 fatty acid   |
| -80.72 | BRD-A83326220 | brazilin                 | Nitric oxide production inhibitor      |
| -80.84 | BRD-K13927029 | retinol                  | Retinoid receptor ligand               |
| -80.98 | BRD-K85266041 | DNQX                     | Glutamate receptor antagonist          |
| -81.23 | BRD-K79425933 | benperidol               | Dopamine receptor antagonist           |
| -81.33 | BRD-K02404261 | caffeine                 | Adenosine receptor antagonist          |
| -81.36 | BRD-A91452556 | estradiol-cypionate      | Estrogen receptor agonist              |
| -81.40 | BRD-K17306061 | aprepitant               | Tachykinin antagonist                  |
| -81.42 | BRD-K61323504 | SB-225002                | CC chemokine receptor antagonist       |
| -81.59 | BRD-K11742128 | triprolidine             | Histamine receptor antagonist          |
| -81.83 | BRD-A25067867 | benzatropine             | Acetylcholine receptor antagonist      |
| -81.93 | BRD-K14681867 | somatostatin             | Somatostatin receptor agonist          |
| -82.03 | BRD-A31800922 | procyclidine             | Acetylcholine receptor antagonist      |
| -82.08 | BRD-K75478907 | GS-39783                 | GABA receptor modulator                |
| -82.16 | BRD-K19796430 | erismodegib              | Smoothed receptor antagonist           |
| -82.28 | BRD-K22828899 | TUL-XXI039               | Serine/threonine kinase inhibitor      |
| -82.67 | BRD-K36965586 | m-chlorophenylbiguanide  | Serotonin receptor agonist             |

|        |               |                                 |                                            |
|--------|---------------|---------------------------------|--------------------------------------------|
| -82.76 | BRD-A45543382 | metrizamide                     | Radiopaque medium                          |
| -82.83 | BRD-A67605442 | tetrahydrobiopterin             | Nitric oxide stimulant                     |
| -82.99 | BRD-A79903587 | tegafur                         | Thymidylate synthase inhibitor             |
| -83.03 | BRD-K32645441 | dipropyl-5ct                    | Serotonin receptor agonist                 |
| -83.18 | BRD-K99063460 | didanosine                      | Nucleoside reverse transcriptase inhibitor |
| -83.19 | BRD-K94070024 | depomedrol                      | Glucocorticoid receptor agonist            |
| -83.35 | BRD-A11813248 | AM-92016                        | Potassium channel blocker                  |
| -83.46 | BRD-K91733562 | secoisolariciresinol            | Antioxidant                                |
| -83.48 | BRD-K28470988 | L-690330                        | Inositol monophosphatase inhibitor         |
| -83.90 | BRD-K54095730 | CPMD-1                          | p38 MAPK inhibitor                         |
| -84.10 | BRD-A92630576 | trimebutine                     | Opioid receptor agonist                    |
| -84.62 | BRD-K60184833 | tyrphostin-46                   | Tyrosine kinase inhibitor                  |
| -84.88 | BRD-K64606589 | apicidin                        | HDAC inhibitor                             |
| -85.26 | BRD-K10974103 | diloxanide                      | Protein synthesis inhibitor                |
| -85.27 | BRD-K37865504 | LY-2183240                      | FAAH inhibitor                             |
| -85.45 | BRD-K67844266 | MLN-4924                        | Nedd activating enzyme inhibitor           |
| -85.47 | BRD-A02180903 | betamethasone                   | Glucocorticoid receptor agonist            |
| -85.88 | BRD-K77987382 | mebendazole                     | Tubulin inhibitor                          |
| -86.34 | BRD-K62012036 | acitretin                       | Retinoid receptor agonist                  |
| -86.38 | BRD-A35108200 | dexamethasone                   | Glucocorticoid receptor agonist            |
| -86.80 | BRD-K69328504 | L-690488                        | Inositol monophosphatase inhibitor         |
| -87.02 | BRD-A35519318 | benidipine                      | Calcium channel blocker                    |
| -87.29 | BRD-A17448384 | beclometasone                   | Glucocorticoid receptor agonist            |
| -87.62 | BRD-K64670467 | JNJ-16259685                    | Glutamate receptor antagonist              |
| -87.91 | BRD-A29731977 | 17-hydroxyprogesterone-caproate | progesterone receptor agonist              |
| -88.45 | BRD-A29901043 | KIN001-127                      | ITK inhibitor                              |
| -88.91 | BRD-K53790871 | triamcinolone                   | Glucocorticoid receptor agonist            |

|        |               |                   |                                                  |
|--------|---------------|-------------------|--------------------------------------------------|
| -89.02 | BRD-K31542390 | mycophenolic-acid | Dehydrogenase inhibitor                          |
| -89.18 | BRD-K31627533 | rimexolone        | Glucocorticoid receptor agonist                  |
| -89.74 | BRD-K74913225 | brinzolamide      | Carbonic anhydrase inhibitor                     |
| -90.31 | BRD-K20995441 | U-54494A          | Opioid receptor agonist                          |
| -90.40 | BRD-K26548821 | quinpirole        | Dopamine receptor agonist                        |
| -90.52 | BRD-K28667793 | pyrazinamide      | Fatty acid synthase inhibitor                    |
| -91.12 | BRD-K27141178 | SB-203186         | Serotonin receptor antagonist                    |
| -91.37 | BRD-K32330832 | VER-155008        | HSP inhibitor                                    |
| -91.73 | BRD-A65767837 | hydrocortisone    | Glucocorticoid receptor agonist                  |
| -92.20 | BRD-K99498722 | NPI-2358          | Tubulin inhibitor                                |
| -92.25 | BRD-K59184148 | SB-216763         | Glycogen synthase kinase inhibitor               |
| -92.50 | BRD-A23290232 | westcort          | Glucocorticoid receptor agonist                  |
| -92.75 | BRD-K69837166 | trap-101          | Nociceptin/orphanin FQ (NOP) receptor antagonist |
| -92.94 | BRD-A38749782 | fludrocortisone   | Glucocorticoid receptor agonist                  |
| -93.53 | BRD-A28746609 | paclitaxel        | Tubulin inhibitor                                |
| -93.75 | BRD-K49481516 | galantamine       | Acetylcholinesterase inhibitor                   |
| -94.06 | BRD-A35033682 | eriodictyol       | Cytochrome P450 inhibitor                        |
| -94.06 | BRD-A99571536 | dubininidine      | Anti-epileptic                                   |
| -94.39 | BRD-K09963420 | saquinavir        | HIV protease inhibitor                           |
| -94.77 | BRD-K87990216 | piretanide        | Glucocorticoid receptor agonist                  |
| -94.85 | BRD-A51714012 | venlafaxine       | Adrenergic inhibitor                             |
| -94.96 | BRD-A68888262 | azelastine        | Histamine receptor antagonist                    |
| -95.02 | BRD-K64881305 | ispinesib         | Kinesin-like spindle protein inhibitor           |
| -95.38 | BRD-K59273480 | propentofylline   | Adenosine reuptake inhibitor                     |
| -95.52 | BRD-A56012032 | thiorphan         | Membrane metalloendopeptidase inhibitor          |
| -95.56 | BRD-A43150328 | penicillic-acid   | other antibiotic                                 |
| -96.16 | BRD-K17349619 | HLI-373           | MDM inhibitor                                    |
| -96.25 | BRD-A78295502 | hydroquinine      | Antiarrhythmic                                   |

---

|        |               |                                   |                                               |
|--------|---------------|-----------------------------------|-----------------------------------------------|
| -96.36 | BRD-A31159102 | fluoxetine                        | Selective serotonin reuptake inhibitor (SSRI) |
| -96.48 | BRD-A42167015 | carteolol                         | Adrenergic receptor antagonist                |
| -96.94 | BRD-A16700644 | isoxsuprine                       | Adrenergic receptor agonist                   |
| -97.67 | BRD-K38003476 | clocortolone                      | Glucocorticoid receptor agonist               |
| -97.72 | BRD-K62206109 | VUF-5681                          | Histamine receptor antagonist                 |
| -98.23 | BRD-K23875128 | RHO-kinase-inhibitor-III[rockout] | Rho associated kinase inhibitor               |
| -98.24 | BRD-A73741725 | exemestane                        | Aromatase inhibitor                           |
| -98.59 | BRD-K54210043 | NS-1619                           | Calcium channel activator                     |
| -98.80 | BRD-K72093121 | vidarabine                        | Antiviral                                     |
| -99.25 | BRD-K40227168 | vinburnine                        | Adrenergic receptor antagonist                |
| -99.26 | BRD-A01787639 | naftopidil                        | Adrenergic receptor antagonist                |
| -99.79 | BRD-K76534306 | enrofloxacin                      | Bacterial DNA gyrase inhibitor                |
